# Supplementary material for: Regulation of the Drosophila Enhancer of split and invected-engrailed Gene Complexes by Sister Chromatid Cohesion Proteins
Source: PLoS One. 2009 Jul 9;4(7):e6202. doi: 10.1371/journal.pone.0006202 (PMC2703808; doi:10.1371/journal.pone.0006202)
Supplement: Table S5 — (0.05 MB DOC) [file pone.0006202.s005.doc]

**Table S5. RNA polymerase II and cohesin binding to genes that increase or decrease in expression with Rad21 or Nipped-B RNAi.**

| Expression Changea | Genes (G)b | PoIII (P)c | P/G | cohesin (C)d | | C/G | | P+Ce | (P+C)/C | (P+C)/P |
| --- | --- | --- | --- | --- | --- | --- | --- | --- | --- | --- |
| All |  | 4282 |  |  | |  | | 816 |  | 0.19 |
| Increase | 333 | 225 | 0.68 | 189 | | 0.57 | | 157 | 0.83 | 0.70 |
| Decrease | 407 | 268 | 0.66 | 146 | | 0.36 | | 120 | 0.82 | 0.45 |
| Increase vs Decreasef |  |  | p = 0.34 |  | p = 9.7x10-9 | | |  |  |  |
| Increase vs Allg |  |  |  |  | | |  |  |  | p = 2.4 x 10-57 |
| Decrease vs Allg |  |  |  |  | | |  |  |  | p = 2.3 x 10-20 |

aAll genes, or genes that increase or decrease in expression ≥ 2-fold in two or more RNAi treatments

bNumber of genes (G) with indicated expression change

cNumber of genes with indicated expression change that bind RNA polymerase II (PolII, P)

dNumber of genes with indicated expression change that bind cohesin and Nipped-B (C)

eNumber of genes with indicated expression change that bind both PolII (P) and cohesin (C)

fComparison for PolII or cohesin binding with Fisher’s exact test

gComparison of PolII-binding genes for cohesin binding with Fisher’s exact test
